# Supplementary material for: Photoinduced processes in fullerenopyrrolidine and fullerenopyrazoline derivatives substituted with an oligophenylenevinylene moietyElectronic supplementary information (ESI) available: synthetic procedures and full characterization of all new compounds. See http://www.rsc.org/suppdata/jm/b2/b200432a/
Source: Royal Society of Chemistry journal article supplement (doi:10.1039/b200432a), 2002-04-30
Supplement: b200432a.doc [file b200432a.doc]

## Supplementary data

## SYNTHETIC PROCEDURES AND FULL CHARACTERIZATION

## OF ALL NEW MOLECULES

Photoinduced Processes in Fulleropyrrolidine and Fulleropyrazoline Derivatives Substituted with an Oligophenylenevinylene Moiety

Nicola Armaroli,* Gianluca Accorsi, Jean-Paul Gisselbrecht, Maurice Gross,* Victor Krasnikov, Dimitris Tsamouras, Georges Hadziioannou,* María J. Gómez-Escalonilla, Fernando Langa,* Jean-François Eckert, Jean-François Nierengarten*

**General synthetic** **methods**. Reagents and solvents were purchased as reagent grade and used without further purification. Compounds **1**1 and **3**2 were prepared as previously reported. All reactions were performed in standard glassware under an inert Ar atmosphere. Reactions under microwaves were carried out in a focused reactor (Maxidigest MX-350 from Prolabo) equipped with an infrared temperature detector. The irradiation power and temperature were controlled with the program MPX-2 from PACAM. Evaporation and concentration were done at water aspirator pressure and drying *in vacuo* at 10-2 Torr. Column chromatography: silica gel *60* (230-400 mesh, 0.040-0.063 mm) was purchased from *E. Merck*. Thin Layer Chromatography (TLC) was performed on glass sheets coated with silica gel *60* *F254* purchased from *E. Merck*, visualization by UV light. Melting points were measured on an *Electrothermal Digital Melting Point* apparatus and are uncorrected. IR spectra (cm-1) were measured on an *ATI Mattson Genesis Series FTIR* instrument. NMR spectra were recorded on a *Bruker AC 200* (200 MHz) or a *Bruker* *AM 400* (400 MHz) with solvent peaks as reference. FAB-mass spectra (*m/z*) were taken on a *ZA HF* instrument with 4-nitrobenzyl alcohol as matrix. MALDI-TOF mass spectra were obtained on a Bruker ReflexIII instrument. Elemental analysis were performed by the analytical service at the Institut Charles Sadron (Strasbourg, France).

**Compound 2**. A mixture of **1** (3.9 g. 4.21 mmol) and TFA (40 mL) in CH2Cl2/H2O 1:1 (120 mL) was stirred at room temperature for 5 h. The organic layer was then washed with water (4 x), dried over MgSO4, filtered, and evaporated. Column chromatography on SiO2 (CH2Cl2/hexane 1:1) yielded **2** (3.2 g, 3.83 mmol, 91%) as yellow crystals (mp 86°C). 1H NMR (CDCl3):  10.00 (s, 1 H), 7.88 (d, *J* = 8 Hz, 2H), 7.66 (d, *J* = 8 Hz, 2H), 7.53 (s, 4H), 7.22 (AB, *J* = 16.5 Hz, 2H), 7.02 (AB, *J* = 16.5 Hz, 2H), 6.73 (s, 2H), 4.04 (t, *J* = 6.5 Hz, 4H), 4.00 (t, *J* = 6.5 Hz, 2H), 1.80 (m, 6H), 1.32 (m, 54H), 0.89 (t, *J* = 6.5 Hz, 9H). 13C NMR (CDCl3):  191.58, 153.31, 143.45, 138.50, 137.70, 135.62, 135.24, 132.33, 131.76, 130.25, 129.40, 127.26, 127.00, 126.85, 105.27, 73.55, 69.18, 31.93, 30.33, 29.67, 29.43, 26.12, 22.68, 14.12. IR (CH2Cl2):  1697 (C=O). UV-Vis (CH2Cl2) 384 (39860). Anal calcd. for C59H90O4 (863.36): C 82.08, H 10.51; found C 82.20, H 10.60.

**Compound 3PV**. A 1 M LiAlH4 solution in THF (300 L) was added to a stirred solution of **2** (1.0 g. 1.15 mmol) in dry THF (6 mL) at 0°C under argon. After 1 h. the reaction was quenched with AcOEt, then methanol and water. The resulting mixture was filtered over celite and evaporated. The crude product was dissolved in CH2Cl2. The organic layer was washed with water, dried over MgSO4, filtered and evaporated. Column chromatography on SiO2 (CH2Cl2) yielded 3PV (860 mg, 86%) as a yellow solid. 1H NMR (CDCl3):  7.53 (d, *J* = 8 Hz, 2H), 7.50 (s, 4H), 7.37 (d, *J* = 8 Hz, 2H), 7.12 (s, 2H), 7.01 (AB, *J* = 16.5 Hz, 2H), 6.72 (s, 2H), 4.72 (d, *J* = 6 Hz, 2H), 4.04 (t, *J* = 6.5 Hz, 4H), 4.00 (t, *J* = 6.5 Hz, 2H), 1.80 (m, 6H), 1.68 (t, *J* = 6 Hz, 1H), 1.32 (m, 54H), 0.89 (t, *J* = 6.5 Hz, 9H). 13C NMR (CDCl3):  153.29, 140.26, 138.34, 136.81, 136.41, 132.50, 128.83, 128.32, 128.02, 127.38, 127.23, 126.82, 126.67, 105.19, 73.55, 69.17, 65.13, 31.93, 30.33, 29.66, 29.44, 29.38, 26.12, 22.70, 14.12. Anal calcd. for C59H92O4 (865.38): C 81.89, H 10.72; found C 82.15, H 10.85.

**Compound A-3PV.** A mixture of **2** (370 mg. 0.42 mmol), C60 (308 mg. 0.42 mmol) and *N*-phenylglycine (52 mg. 3.42 mmol) in toluene (350 mL) was refluxed under Ar for one week. After cooling, the resulting solution was evaporated and column chromatography on SiO2 (hexane/toluene 1:1) yielded **A-3PV** (200 mg, 28%) as a brown solid (mp 215°C). 1H NMR (CDCl3):  7.79 (d, *J* = 8.5 Hz, 2 H), 7.49 (d, *J* = 8.5 Hz, 2 H), 7.44 (s, 4 H), 7.44 (m, 4 H), 7.08 (m, 1 H), 7.07 (s, 2 H), 7.05 (AB, *J* = 16.5 Hz, 2 H), 6.69 (s, 2 H), 6.09 (s, 1 H), 5.32 (AB, *J* = 9.9 Hz, 2 H), 4.01 (t, *J* = 6.5 Hz, 4 H), 3.96 (t, *J* = 6.5 Hz, 2 H), 1.84 (m, 4 H), 1.78 (m, 2 H), 1.32 (m, 54 H), 0.89 (t, *J* = 6.5 Hz, 9 H). 13C NMR (CDCl3):  155.86, 153.70, 153.40, 153.28, 153.16, 147.37, 147.28, 146.61, 146.35, 146.23, 146.16, 146.10, 145.98, 145.71, 145.58, 145.44, 145.33, 145.14, 144.69, 144.59, 144.43, 143.16, 143.03, 142.71, 142.59, 142.25, 142.13, 142.05, 141.86, 141.71, 141.55, 140.26, 140.19, 139.90, 139.46, 138.37, 137.22, 137.10, 136.84, 136.53, 136.33, 135.79, 135.69, 132,50, 129.18, 128.92, 128.60, 127.94, 127.23, 126.95, 126.84, 126.68, 122.41, 121.45, 105.21, 76.55, 73.54, 69.17, 68.50, 68.18, 31.93, 30.34, 29.67, 29.44, 29.38, 26.13, 22.70, 14.12. FAB-MS: m/z (%): 720.0 ([C60]+), 1672.8 ([*M* + H]+). Anal calcd. for C126H97NO3.H2O (1691.18): C 89.49, H 5.90, N 0.83; found C 89.59, H 5.89, N 0.82.

# Compound A. A mixture of 3 (300 mg. 0.45 mmol), C60 (328 mg. 0.45 mmol) and *N*-phenylglycine (344 mg. 2.27 mmol), in toluene (350 mL) was refluxed under Ar for 16 h. After cooling, the resulting solution was evaporated and column chromatography on SiO2 (toluene/hexane 3:2) yielded A (80 mg, 10%) as a brown solid (mp 104°C). 1H NMR (CDCl3):  7.38 (m, 4H), 7.08 (m, 1H), 6.98 (s, 2H), 5.91 (s, 1H), 5.31 (AB, *J* = 9.9 Hz, 2H), 3.88 (m, 6H), 1.66 (m, 6H), 1.32 (m, 54H), 0.89 (t, *J* = 6.5 Hz, 9H). 13C NMR (CDCl3):  155.86, 153.79, 153.66, 153.38, 153.22, 147.53, 147.39, 146.90, 146.38, 146.25, 146.10, 145.98, 145.71, 145.59, 145.43, 145.27, 144.69, 144.43, 143.19, 143.03, 142.71, 142.62, 142.20, 142.13, 142.05, 141.80, 141.69, 141.56, 140.29, 140.10, 139.61, 139.49, 138.23, 136.49, 135.95, 135.66, 132.70, 129.12, 122.29, 121.23, 107.83, 76.77, 76.61, 73.19, 69.31, 68.44, 67.98, 31.93, 30.20, 29.68, 29.43, 29.38, 29.16, 26.05, 25.99, 22.68, 14.12. Anal calcd. for C109H85NO3 (1456.88): C 89.86, H 5.88, N 0.96; found C 90.46, H 5.73, N 0.89.

**Compound 4**. A solution of 2 (175 mg, 0.202 mmol), *p*-nitrophenylhydrazine (31 mg, 0.202 mmol) and acetic acid (0.1 mL) in ethanol (30 mL) was refluxed for 4.5 h. After cooling, the resulting mixture was evaporated and recristallization from ethanol yielded 4 (187 mg, 93%) as an orange solid (mp 143-145ºC). 1H-NMR (CDCl3):  8.20 (d, *J* = 9.1 Hz, 2H), 8.09 (bs, 1H), 7.80 (s, 1H), 7.69 (d, *J* = 8.8 Hz, 2H), 7.56 (d, *J* = 8.8 Hz, 2H), 7.52 (s, 4H), 7.16 (s, 2H) 7.15 (d, *J* = 9.1 Hz, 2H), 7.01 (AB, *J* = 17 Hz, 2H), 6.73 (s, 2H), 4.07-3.95 (m, 6H), 1.87-1.76 (m, 6H), 1.27 (m, 54H), 0.89 (t, *J* = 7 Hz, 9H). 13C-NMR (CDCl3):  153.47, 149.61, 141.17, 140.52, 138.85, 138.45, 137.27, 136.34, 133.43, 132.64, 129.42, 129.20, 127.83, 127.32, 127.16, 127.03, 126.93, 126.40, 111.91, 105.23, 73.78, 69.30, 32.12, 30.53, 29.91, 29.86, 29.62, 26.32, 22.89, 14.32; IR (KBr):  3284.7, 2920.7, 1596.3, 1326.1, 1310.6, 1111.3, 956.2, 837.3. MALDI-TOF: 997.6 (m/z), 998.6 ([*M* + H]+). Anal calcd for C65H95N3O5 (997.73): C 78.19, H 9.59, N 4.21; found: C 77.74, H 9.69, N 4.20.

**Compound B-3PV**. A solution of 4 (70 mg, 0.07 mmol) and pyridine (5 L) in dry chloroform (10 mL) was cooled to 0ºC under Ar; NCS (19 mg, 0.14 mmol) was added and the resulting mixture was stirred at this temperature for 15 min; after heating at room temperature, a solution of C60 (50 mg, 0.07 mmol) and Et3N (20 L) in dry toluene (50 mL) was added. The mixture was irradiated in a focused microwave reactor at 210W for 40 min. Column chromatography (SiO2, toluene) gave 3 (69 mg, 57% or 85% based on recovered C60) as a brown solid (mp  200ºC ). 1H-NMR (CDCl3)  8.35 (d, *J* = 9.9 Hz, 2H), 8.28 (d, *J* = 9.9 Hz, 2H), 8.28 (d, *J* = 8.4 Hz, 2H), 7.68 (d, *J* = 8.4 Hz, 2H), 7.52 (s, 4H), 7.19 (AB, *J* = 17 Hz, 2H), 7.01 (AB, *J* = 17 Hz, 2H), 6.73 (s, 2H), 4.06-3.95 (m, 6H), 1.87-1.72 (m, 6H), 1.27 (m, 54H), 0.89 (t, *J* = 6.5 Hz, 9H). 13C-NMR (CDCl3):  153.30, 146.45, 146.11, 146.09, 145.98, 145.65, 145.40, 145.29, 145.26, 144.56, 144.37, 144.15, 143.20, 143.11, 143.00, 142.93, 142.46, 142.13, 142.10, 142.02, 141.93, 140.49, 139.41, 139.12, 137.31, 137.05, 136.20, 135.96, 132.37, 130.44, 130.05, 129.42, 129.17, 127.24, 127.08, 127.03, 126.89, 126.73, 125.36, 119.42, 105.29, 99.49, 73.52, 69.19, 31.89, 30.31, 29.71, 29.66, 29.62, 29.58, 29.42, 29.40, 29.35, 29.33, 26.10, 22.65, 14.07. IR (KBr):  2912.7, 1586.7, 1493.9, 1314.9, 1102.7, 963.5, 830.9, 525.9. MALDI-TOF: 1717.6 ([*M*]+), 720 ([C60]+). Anal calcd for C125H93N3O5 (1717.13): C 87.44, H 5.46, N 2.45; found: C 87.31, H 5.47, N 2.51.

**Compound 5.** A solution of 3 (200 mg, 0.303 mmol), *p*-nitrophenylhydrazine (46.4 mg, 0.303 mmol), and acetic acid (0.1 mL) in ethanol (30 mL) was refluxed for 4 h. After cooling, the resulting mixture was evaporated and recristallization from ethanol yielded 5 (204 mg, 85%) as an orange solid (mp 76-77ºC); 1H-NMR (CDCl3):  8.18 (d, *J* = 9.1 Hz, 2H), 8.04 (s, 1H), 7.69 (s, 1H), 7.11 (d, *J* = 9.1 Hz, 2H), 6.88 (s, 2H), 4.07-3.97 (m, 6H), 1.87-1.72 (m, 6H), 1.27 (m, 54H), 0.88 (t, *J* = 6.5 Hz, 9H). 13C-NMR (CDCl3):  153.66, 149.61, 141.82 (2C), 140.40, 140.05, 129.22, 126.40 (2C), 111.80 (2C), 105.42 (2C), 73.78, 69.39, 32.11, 30.51, 29.90, 29.85, 29.62, 29.56, 26.31, 22.88, 14.32. IR (KBr) 2945.8, 2912.7, 1593.3, 1467.4, 1314.9, 1109.3, 837.5. MALDI-TOF: 793.5 ([*M* + H]+).

**Compound B.** A solution of 5 (55.6 mg, 0.07 mmol)) and pyridine (5 L) in dry chloroform (10 mL) was cooled to 0ºC under Ar; NCS (19 mg, 0.14 mmol) was added and the resulting mixture was stirred at this temperature for 15 min; after heating at room temperature, a solution of C60 (50.4 mg, 0.07 mmol) and Et3N (20 L) in dry toluene (50 mL) was added. The mixture was irradiated in a focused microwave reactor at 210W for 40 min. Column chromatography (SiO2, toluene/hexane 1:1) gave B (45 mg, 43% or 63% based on recovered C60) as a brown solid (mp  200ºC). 1H-NMR (CDCl3):  8.34 (d, *J* = 9.5 Hz, 2H), 8.25 (d, *J* = 9.5 Hz), 7.46 (s, 2H), 4.08-3.96 (m, 6H), 1.81-1.75 (m, 6H), 1.26 (m, 54H), 0.88 (t, *J* = 6.5 Hz, 6H). 13C-NMR (CDCl3):  153.60, 149.98, 147.91, 147.45, 146.93, 146.71, 146.63, 146.47, 146.36, 146.21, 145.94, 145.90, 145.62, 145.56, 145.50, 144.81, 144.60, 144.42, 143.58, 143.47, 143.29, 143.21, 142.72, 142.55, 142.41, 142.35, 142.27, 142.09, 140.37, 140.17, 139.68, 137.26, 136.36, 126.34, 125.64, 119.68, 108.26, 73.85, 69.51, 32.18, 30.59, 29.98, 29.94, 29.84, 29.64, 29.51, 26.33, 22.95, 14.40. IR (KBr):  2924.36, 1586.92, 1497.09, 1322.42, 1112.83, 838.35, 528.94; MALDI-TOF: 1513.4 ([*M* + H]+) , 720 ([C60]+). Anal calcd for C109H81N3O5 (1512.86): C 86.54, H 5.40, N 2.78. Found: C 86.19, H 5.48, N 2.81.

### References

1J. F. Eckert, J. F. Nicoud, D. Guillon and J. F. Nierengarten, *Tetrahedron Lett.*, 2000, **41**, 6411.

2G. Zerban and H. Meier, *Z.Naturforsch.(B)*, 1993, **48**, 171.
